# Supplementary material
Source: PubMed Central journal article supplement (PMC5710573)
Supplement: jamainternmed-177-1273-s001.pdf [file jamainternmed-177-1273-s001.pdf]

## Supplementary Online Content

Bhindi B, Wallis CJD, Nayan M, et al. The association between vasectomy and prostate cancer: a systematic review and meta-analysis. *JAMA Intern Med*. Published online July 17, 2017. doi:10.1001/jamainternmed.2017.2791

**eAppendix 1.** Literature Search Strategy

**eAppendix 2.** Exclusion Following Full Text Review

**eAppendix 3.** Pooled Estimates of Studies Reporting Unadjusted Effect Estimates

**eAppendix 4.** Calculation of Estimates for Absolute Risk Increase, Number Needed to Harm, and Population-Attributable Fraction

**eAppendix 5.** Discussion of Hill's Criteria of Causation

**eFigure 1.** Forest Plots for Meta-Analyses of the Adjusted Estimates for the Association Between Vasectomy and Any Prostate Cancer for Cohort Studies Reporting on Time-to-Event Analyses

**eFigure 2.** Meta-Analysis of Cohort Studies That Accounted for PSA Testing

**eFigure 3.** Forest Plots for Meta-Analyses of Unadjusted Estimates for the Association Between Vasectomy and Any Prostate Cancer by Study Design and Risk of Bias

**eFigure 4.** Funnel Plots

**eTable 1.** Risk Adjustment for Each Included Study

**eTable 2.** Newcastle-Ottawa Scale for Risk of Bias Assessment of Studies Included in the Meta-Analysis

**eTable 3.** Pooled Adjusted Estimates for Association Between Vasectomy and Prostate Cancer, Excluding Abstracts

**eTable 4.** Studies Reporting on the Impact Time Since Vasectomy on the Association Between Vasectomy and Prostate Cancer

**eTable 5.** Studies Reporting on the Impact of Age at Vasectomy on the Association Between Vasectomy and Prostate Cancer

**eReferences**

This supplementary material has been provided by the authors to give readers additional information about their work.

## **eAppendix 1. Literature Search Strategy**

All searches were run on March 21, 2017; no restrictions on language or publication date; controlled vocabulary and keywords were used for vasectomy and prostate cancer.

### **Ovid MEDLINE(R) 1946 to Present and Epub Ahead of Print, In-Process & Other Non-Indexed Citations and Ovid MEDLINE(R) Daily**

1. vasectomy/ or (vasectom\* or postvasectom\* or deferentectom\* or (vas adj3 (ligat\* or occlusion\* or occlud\*)) or vasoligat\* or vasocclu\* or (spermatic adj2 cord adj2 resect\*)).tw.
2. ductus deferens/su or (ductus adj3 deferens adj3 (ligat\* or occlu\* or surg\* or procedur\*)).tw.
3. exp prostatic neoplasms/ or (prostat\* adj5 (neoplas\* or cancer\* or carcinoma\* or adenocarcinoma\* or malignan\* or tumor\* or tumour or mass or metastat\*)).tw.
4. (1 or 2) and 3

### **Embase 1988 to 2017 Week 12**

1. vasectomy/ or (vasectom\* or postvasectom\* or deferentectom\* or (vas adj3 (ligat\* or occlusion\* or occlud\*)) or vasoligat\* or vasocclu\* or (spermatic adj2 cord adj2 resect\*)).tw.
2. vas deferens/su or (ductus adj3 deferens adj3 (ligat\* or occlu\* or surg\* or procedur\*)).tw.
3. exp prostatic cancer/ or (prostat\* adj5 (neoplas\* or cancer\* or carcinoma\* or adenocarcinoma\* or malignan\* or tumor\* or tumour or mass or metastat\*)).tw.
4. (1 or 2) and 3

### **Web of Science**

1. #4 AND #3
2. ts=(prostat\* NEAR/5 (neoplas\* or cancer\* or carcinoma\* or adenocarcinoma\* or malignan\* or tumor\* or tumour or mass or metastat\*))
3. #2 OR #1
4. ts=(ductus NEAR/3 deferens NEAR/3 (ligat\* or occlu\* or surg\* or procedur\*))
5. ts=(vasectom\* or postvasectom\* or deferentectom\* or (vas NEAR/3 (ligat\* or occlusion\* or occlud\*)) or vasoligat\* or vasocclu\* or (spermatic NEAR/3 cord NEAR/3 resect\*))

### **Scopus**

(( TITLE-ABS-KEY ( vasectom\* OR postvasectom\* OR deferentectom\* OR ( vas W/3 ( ligat\* OR occlusion\* OR occlud\* ) ) OR vasoligat\* OR vasocclu\* OR ( spermatic W/3 cord W/3 resect\* ) ) ) OR ( TITLE-ABS-KEY ( ductus W/3 deferens W/3 ( ligat\* OR occlu\* OR surg\* OR procedur\* ) ) ) ) AND ( TITLE-ABS-KEY ( prostat\* W/5 ( neoplas\* OR cancer\* OR carcinoma\* OR adenocarcinoma\* OR malignan\* OR tumor\* OR tumour OR mass OR metastat\* ) ) ) )

**eAppendix 2.** Exclusion Following Full Text Review

| <b>First Author</b> | <b>Journal</b>          | <b>Year</b> | <b>Reason for exclusion</b>                                                                                                |
|---------------------|-------------------------|-------------|----------------------------------------------------------------------------------------------------------------------------|
| No author           | CA – A Cancer Journal   | 2000        | Not original research (editorial/letter)                                                                                   |
| Adshead             | Medicine Today          | 2004        | Not original research (review article)                                                                                     |
| Aiken               | Pan American J...       | 2014        | Not original research (editorial/letter)                                                                                   |
| Alcaraz             | European J of Cont...   | 1996        | Not original research (review article)                                                                                     |
| Allen               | Nursing Standard        | 1993        | Not original research (editorial/letter)                                                                                   |
| Anonymous           | Lancet                  | 1991        | Not original research (editorial/letter)                                                                                   |
| Anonymous           | Nursing Standard        | 1992        | Not original research (editorial/letter)                                                                                   |
| Anonymous           | Amer Fam Physician      | 1993        | Not original research (editorial/letter)                                                                                   |
| Anonymous           | Consumer Report Hea..   | 1994        | Not original research (editorial/letter)                                                                                   |
| Anonymous           | Contracept Tech Update  | 1998        | Not original research (editorial/letter)                                                                                   |
| Bowersox            | J Nat Canc Inst         | 1993a       | Not original research (editorial/letter)                                                                                   |
| Bowersox            | J Nat Canc Inst         | 1993b       | Not original research (editorial/letter)                                                                                   |
| Broadbent           | Evidence-based Practice | 2012        | Not original research (editorial/letter)                                                                                   |
| Camila Fernandez    | Revista Chilena de...   | 2015        | Not original research (editorial/letter)                                                                                   |
| Chacko              | J Urol                  | 2002        | Duplication of study cohort (abstract; full article included in our analysis– Chacko 2002)                                 |
| Choo                | Lancet                  | 1993        | Not original research (editorial/letter)                                                                                   |
| Chung               | Epi & Infection         | 2013        | Effect estimate not provided and unable to calculate from provided data. Unable to get in touch with corresponding author. |
| Colditz             | Am J Epi                | 1991        | Duplication of study cohort (abstract; full articles included in our analysis: Giovannucci 1993a and Siddiqui 2014)        |
| Crozier             | J Clin Epi              | 1993        | Not original research (review article)                                                                                     |
| Diconsiglio         | Fam Plan World          | 1993        | Not original research (editorial/letter)                                                                                   |
| Djerassi            | Nature                  | 1994        | Not original research (editorial/letter)                                                                                   |
| Galletly            | Eur J Cancer Care       | 1998        | Not original research (review article)                                                                                     |
| Giovannucci         | J Am Med Assoc          | 1993b       | Duplication of study cohort (updated report included in our analysis: Siddiqui 2014)                                       |
| Giovannucci         | J Am Med Assoc          | 1993c       | Not original research (editorial/letter)                                                                                   |
| Giovannucci         | N Engl J Med            | 1992        | Did not evaluate outcome of interest                                                                                       |
| Hayes               | J Nat Cancer Inst       | 1995        | Not original research (editorial/letter)                                                                                   |
| Hayes               | Brit J Cancer           | 2000        | Did not evaluate exposure of interest                                                                                      |

|             |                        |      |                                                                                                                                                            |
|-------------|------------------------|------|------------------------------------------------------------------------------------------------------------------------------------------------------------|
| Hodgson     | Aging Male             | 2009 | Not original research (review article)                                                                                                                     |
| Holman      | BJU International      | 2000 | Did not evaluate outcome of interest                                                                                                                       |
| Howards     | West J Med             | 1994 | Not original research (editorial/letter)                                                                                                                   |
| James       | J Biosocial Science    | 1994 | Not original research (review article)                                                                                                                     |
| Keetch      | J Urol                 | 1995 | Did not evaluate exposure-outcome association of interest (looks at risk of prostate cancer in father/brother/uncle as a function of vasectomy in proband) |
| Lesko       | Am J Epi               | 1997 | Duplication of study cohort (abstract; full article included in our analysis: Lesko 1999)                                                                  |
| Lesko       | J Urol                 | 1999 | Duplication of study cohort (erratum published; most updated version was used: Lesko 1999)                                                                 |
| Lightfoot   | Ann Epi                | 2000 | Duplication of study cohort (abstract; full article included in our analysis: Lightfoot 2004)                                                              |
| Littlejohns | Cancer Epi             | 2016 | Did not evaluate outcome of interest                                                                                                                       |
| Mahon       | J Urol Nursing         | 1993 | Not original research (review article)                                                                                                                     |
| Melchior    | Deutsche Med Wochen    | 2002 | Not original research (editorial/letter)                                                                                                                   |
| Moller      | Brit Med J             | 1994 | Duplication of study cohort (updated report included in our analysis: Lynge 2002)                                                                          |
| Nguyen-V..  | Lancet                 | 1993 | Not original research (editorial/letter)                                                                                                                   |
| Nienhuis    | Brit Med J             | 1992 | Duplication of study cohort (updated report included in our analysis: Goldacre 2005)                                                                       |
| Olsen       | Ugeskrift for Laeger   | 1993 | Not original research (editorial/letter)                                                                                                                   |
| Peterson    | Am J Epi               | 1992 | Did not evaluate outcome of interest                                                                                                                       |
| Preston     | J Urol                 | 2013 | Duplication of study cohort (Siddiqui 2014); reported on different main exposure                                                                           |
| Puhan       | Praxis                 | 2003 | Not original research (review article)                                                                                                                     |
| Rees        | Practitioner           | 2014 | Not original research (editorial/letter)                                                                                                                   |
| Rider       | J Urol                 | 2015 | Duplication of study cohort (Siddiqui 2014); reported on different main exposure                                                                           |
| Rosenberg   | Am J Epi               | 1989 | Duplication of study cohort (abstract; full article included in our analysis: Rosenberg 1994)                                                              |
| Rosenberg   | Am J Epi               | 1990 | Duplication of study cohort (updated report included in our analysis: Rosenberg 1994)                                                                      |
| Sarkar      | Int Med J              | 1999 | Not original research (review article)                                                                                                                     |
| Schroder    | Neder Tijd voor Genees | 1993 | Not original research (review article)                                                                                                                     |
| Sidney      | J Urol                 | 1987 | Duplication of study cohort (updated report included in our analysis: Hiatt 1994)                                                                          |

|             |                        |      |                                                                                                                                                                                  |
|-------------|------------------------|------|----------------------------------------------------------------------------------------------------------------------------------------------------------------------------------|
| Sidney      | Cancer Cause & Control | 1991 | Duplication of study cohort (updated report included in our analysis: Hiatt 1994)                                                                                                |
| Skegg       | New Zeal Med J         | 1993 | Not original research (editorial/letter)                                                                                                                                         |
| Skeeg       | Eur J Cancer           | 1993 | Not original research (review article)                                                                                                                                           |
| Spence      | Am J Epi               | 2012 | Did not evaluate exposure of interest                                                                                                                                            |
| Stollerman  | Hospital Practice      | 1993 | Not original research (editorial/letter)                                                                                                                                         |
| Strayer     | J Fam Practice         | 2002 | Not original research (editorial/letter)                                                                                                                                         |
| Sutcliffe   | Canc Epi Biomark Prev  | 2006 | Duplication of study cohort (Siddiqui 2014); reported on different main exposure                                                                                                 |
| Van Leeuwen | J Urol                 | 2010 | Duplication of study cohort (abstract; full article included in our analysis: Van Leeuwen 2011)                                                                                  |
| Walsh       | Fert & Steril          | 2012 | Effect estimate not provided and unable to calculate from provided data. Contacted corresponding author, raw data is no longer available to calculate necessary effect estimate. |
| Wise        | Brit Med J             | 2014 | Not original research (editorial/letter)                                                                                                                                         |

### **eAppendix 3. Pooled Estimates of Studies Reporting Unadjusted Effect Estimates**

Among cohort studies reporting unadjusted measures of effect, we found no significant increased risk among all studies (4 studies; RR=1.02; 95%CI 0.81-1.30;  $p=0.16$ ;  $I^2=42\%$ ), and small statistically significant associations in the single study utilizing a time-to-event analysis (HR=1.13; 95%CI 1.05-1.20;  $p=0.0005$ ) and two studies deemed at low risk of bias (RR=1.12; 95% 1.05-1.20;  $p=0.0005$ ;  $I^2=0\%$ )(**Supplemental Figure 1**).

The meta-analysis of case-control studies reporting unadjusted odds ratios for a statistically significant association between vasectomy and PCa (31 studies; OR=1.16; 95%CI 1.02-1.32;  $p=0.02$ ;  $I^2 = 66\%$ ). However, there was no longer a significant association when restricting to studies with a low risk of bias (7 studies; OR=0.98; 95%CI 0.84-1.15;  $p=0.11$ ;  $I^2=42\%$ )(**Supplemental Figure 1**).

Although similar in direction, the association between vasectomy and PCa did not reach statistical significance among cross-sectional studies reporting unadjusted measures of effect (4 studies; OR=1.49; 95%CI 0.56-3.96;  $p=0.43$ ;  $I^2 = 99\%$ )(**Supplemental Figure 1**).

**eAppendix 4.** Calculation of Estimates for Absolute Risk Increase, Number Needed to Harm, and Population-Attributable Fraction

For this estimation, the effect estimate from cohort studies deemed at low risk of bias was used (RR 1.05; 95%CI 1.02-1.09).

Absolute lifetime risk (AR) of prostate cancer: 12.9%<sup>1</sup>

Probability of having a vasectomy ( $p_v$ ): 10%<sup>2,3</sup>

Calculation absolute lifetime risk of PCa among men who do not and do get a vasectomy:

$$\begin{aligned}AR_{[PCa-overall]} &= AR_{[PCa-no-vasectomy]} * (1 - p_v) + AR_{[PCa-vasectomy]} * p_y \\ &= AR_{[PCa-no-vasectomy]} * (1 - p_v) + RR_{[vasectomy]} * AR_{[PCa-no-vasectomy]} * p_y \\ &= AR_{[PCa-no-vasectomy]} * ((1 - p_v) + RR_{[vasectomy]} * p_y)\end{aligned}$$

$$\begin{aligned}AR_{[PCa-no-vasectomy]} &= AR_{[PCa-overall]} / ((1 - p_v) + RR_{[vasectomy]} * p_y) \\ &= AR_{[PCa-overall]} / (1 + p_y * (RR_{[vasectomy]} - 1)) \\ &= 0.129 / (1 + 0.10 * (1.05 - 1)) \\ &= 0.128\end{aligned}$$

$$AR_{[PCa-vasectomy]} = RR_{[vasectomy]} * AR_{[PCa-no-vasectomy]} = 0.135$$

*Of note, due to the low magnitude of the  $RR_{[vasectomy]}$ , the probability of getting a vasectomy has a very small influence in this calculated estimate, and therefore variation in the probability of having a vasectomy is of little importance here.*

Calculation of absolute risk increase (ARI) and number needed to harm (NNH):

$$\begin{aligned}ARI &= AR_{[PCa-no-vasectomy]} - AR_{[PCa-no-vasectomy]} \\ &= 0.006 \text{ (95\%CI 0.003-0.012)} \\ &= \mathbf{0.6\% \text{ (95\%CI 0.3-1.2)}}$$

$$\begin{aligned}NNH &= 1 / ARR \\ &= \mathbf{156}\end{aligned}$$

Calculation of Population Attributable Fraction (PAF):

$$\begin{aligned}PAF &= p_v (RR_{[vasectomy]} - 1) / (p_v (RR_{[vasectomy]} - 1) + 1) \\ &= (0.10 * (1.05 - 1)) / (0.10 * (1.05 - 1) + 1) \\ &= 0.005 \text{ (95\%CI 0.002-0.009)} \\ &= \mathbf{0.5\% \text{ (95\%CI 0.2-0.9)}}$$

## **eAppendix 5.** Discussion of Hill's Criteria of Causation

The criterion of temporality is the only one of the nine that is satisfied. Meanwhile, the criteria of strength and consistency of the association have not been satisfied, based on our analysis. Similarly, based on our review, a biological gradient has not been consistently demonstrated when considering time since vasectomy. One cannot argue for specificity, since vasectomy has been also previously been reported as associated with testicular cancer, cardiovascular disease, and dementia, all of which have been discredited.<sup>4</sup> Also, the case for biologic plausibility is tenuous. While hormonal imbalances,<sup>5</sup> immunologic effects,<sup>6</sup> cell proliferative changes<sup>7</sup> have been suggested to play a role, the data are limited and the exact mechanisms remain speculative.<sup>4,8</sup> Finally, to our knowledge there are no analogies, assessments of coherence, or experimental evidence to support the argument for an association between vasectomy and PCa. Thus, the argument for causality is not compelling given the amount of time and resource that has been dedicated to this research question over the past three decades.



**eFigure 1.** Forest Plots for Meta-Analyses of the Adjusted Estimates for the Association Between Vasectomy and Any Prostate Cancer for Cohort Studies Reporting on Time-to-Event Analyses

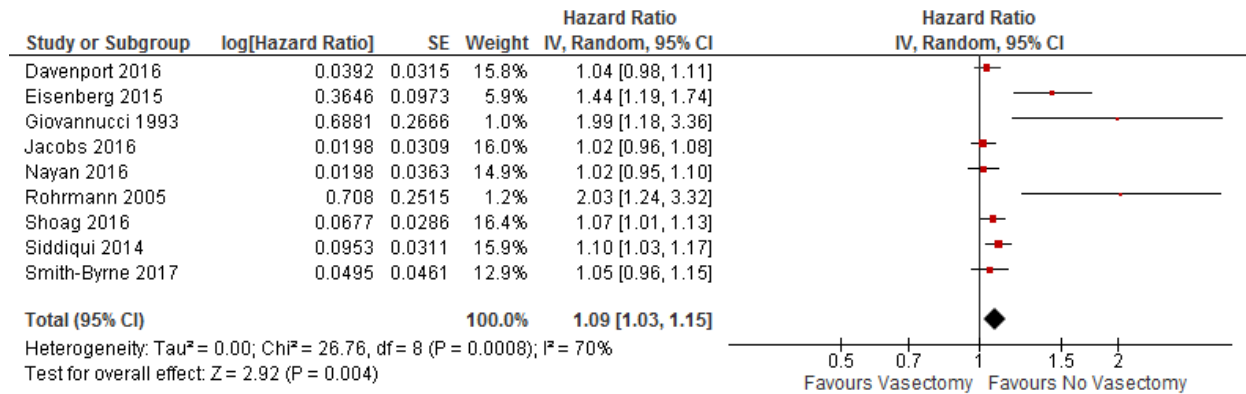

**eFigure 2.** Meta-Analysis of Cohort Studies That Accounted for PSA Testing

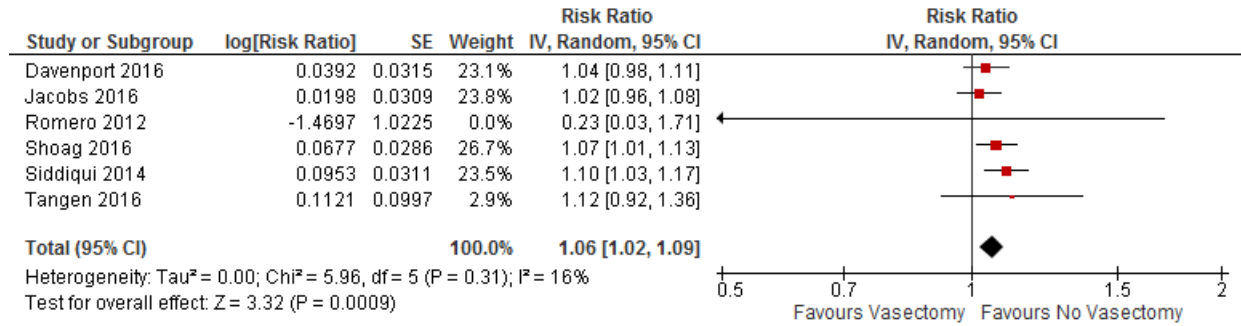

Abbreviations: SE = standard error; IV = inverse variance; CI = confidence interval

**eFigure 3.** Forest Plots for Meta-Analyses of Unadjusted Estimates for the Association Between Vasectomy and Any Prostate Cancer by Study Design and Risk of Bias

Supplementary Figure 3a: All cohort studies

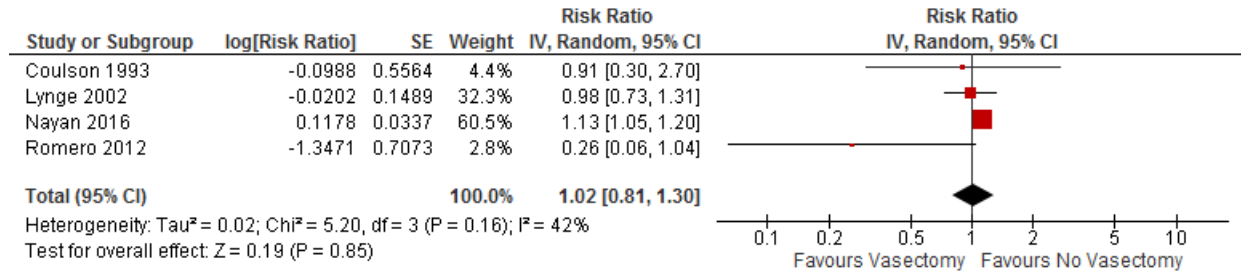

Supplementary Figure 3b: Cohort studies, low risk of bias

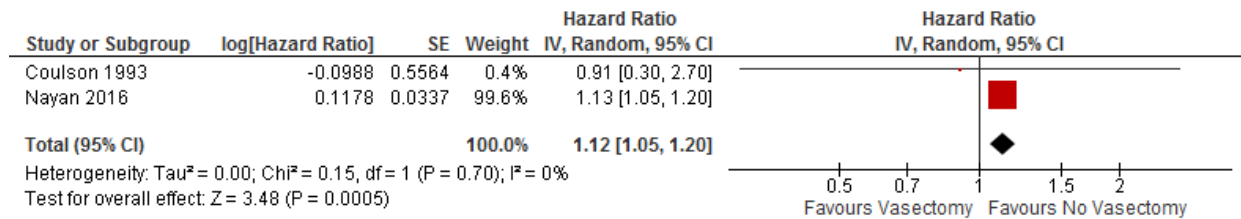

Supplementary Figure 3c: All case-control studies

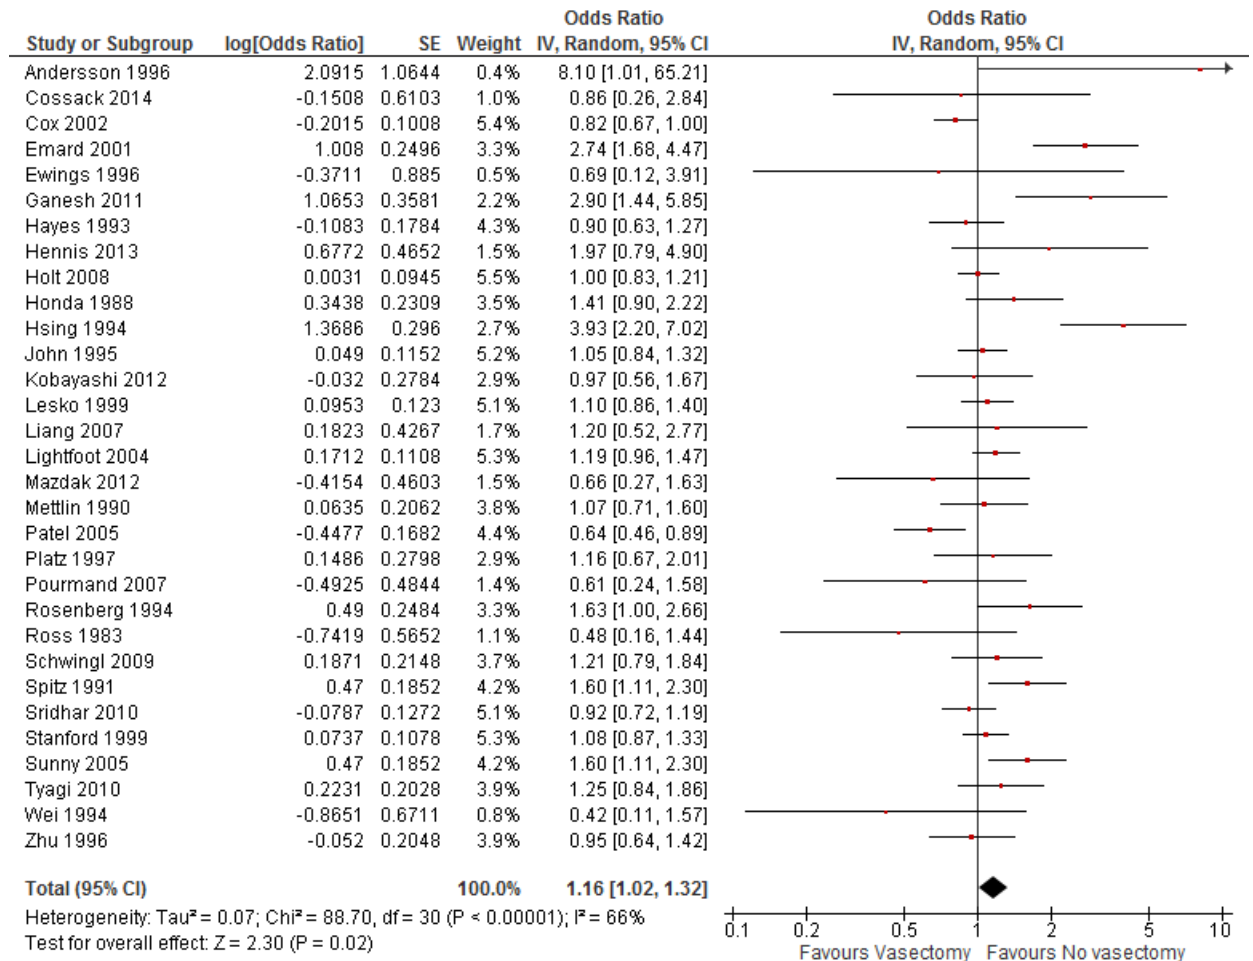

Supplementary Figure 3d: Case-control studies, low risk of bias

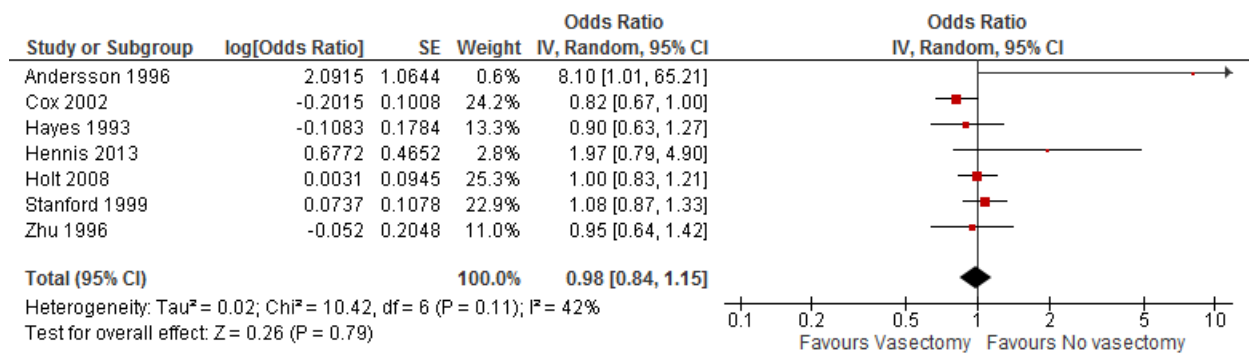

Supplementary Figure 3e: Cross-sectional studies

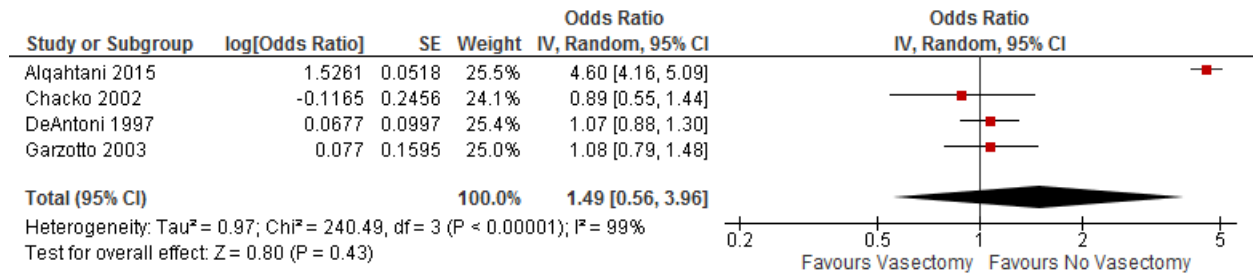

Legend: Plots are shown for (a) all cohort studies, (b) cohort studies deemed as low risk of bias, (c) for all case-control studies, (d) for case-control studies deemed as low risk of bias, and (e) for all cross-sectional studies.

Abbreviations: SE = standard error; IV = inverse variance; CI = confidence interval

**eFigure 4.** Funnel Plots

Supplementary Figure 4a: All cohort studies reporting adjusted measure of effect.

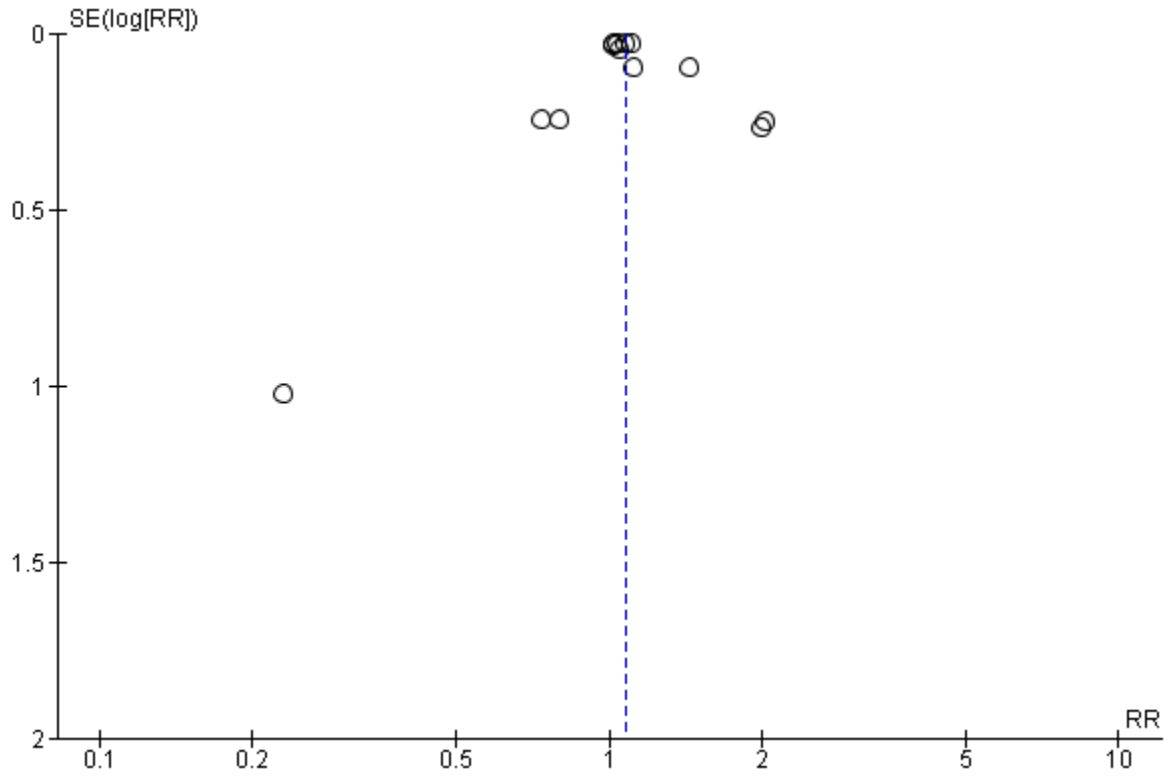

Supplementary Figure 4b: All case-control studies reporting unadjusted measure of effect.

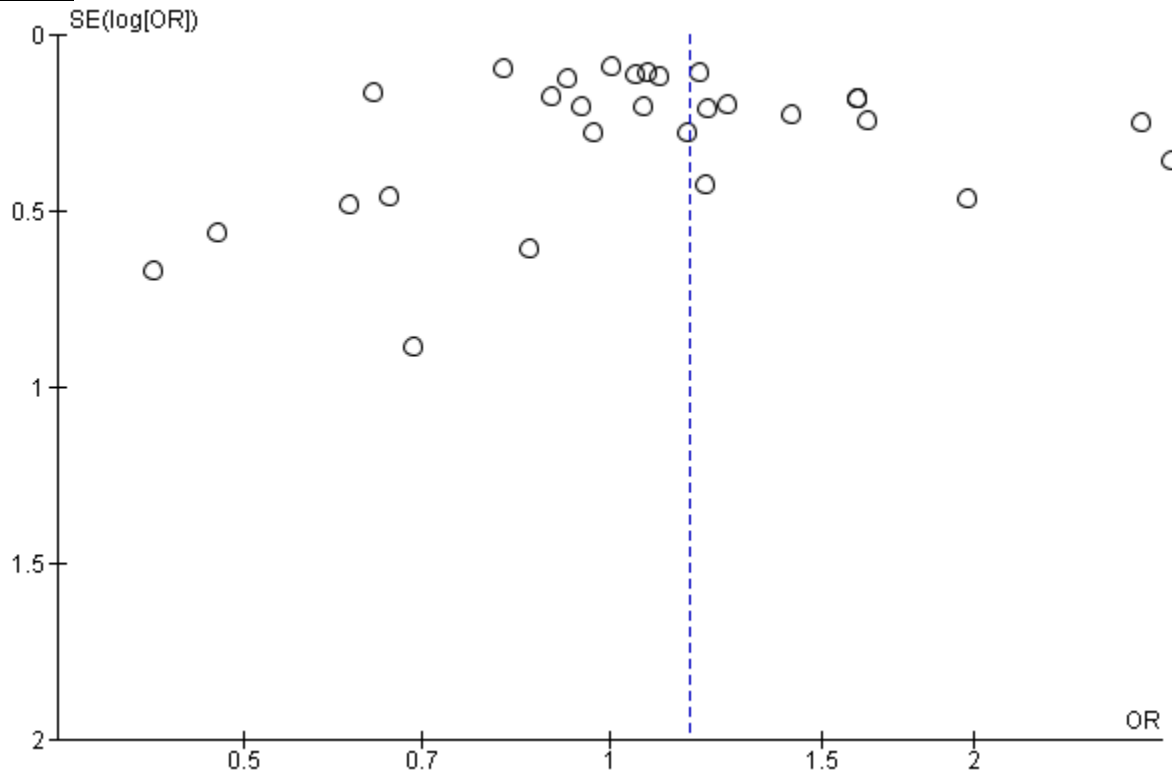

Supplementary Figure 4c: All case-control studies reporting adjusted measure of effect.

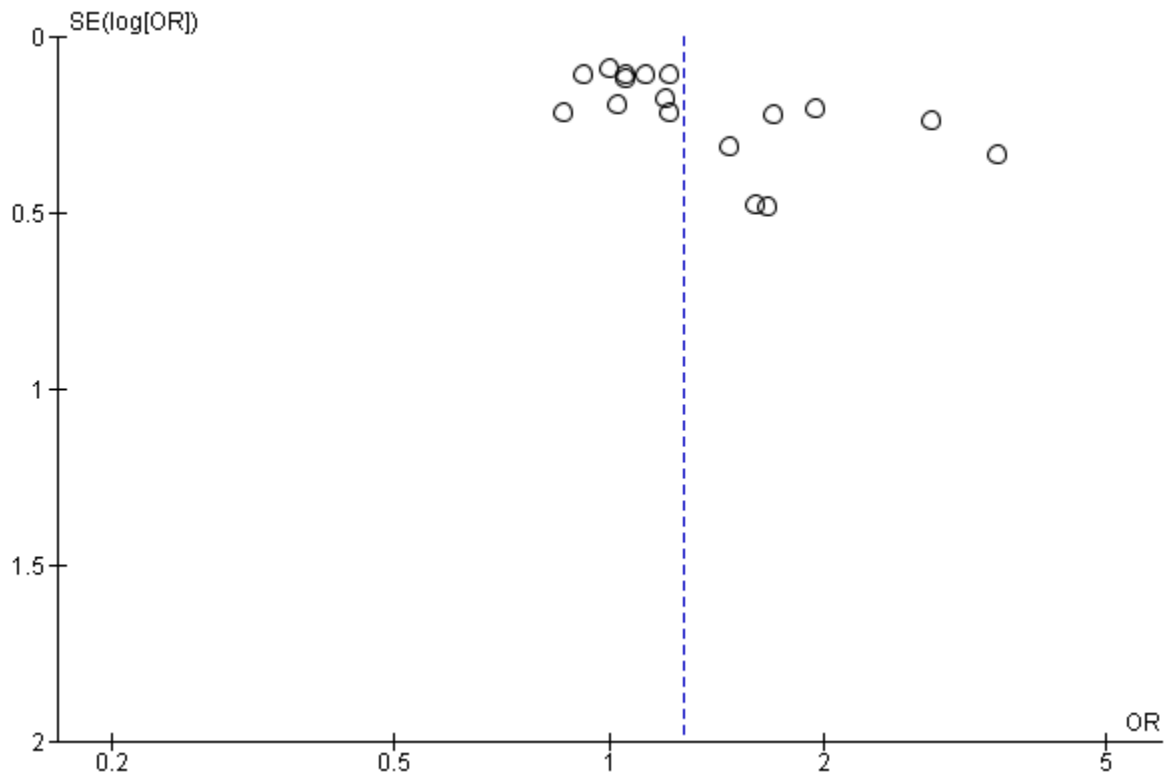

Legend: Funnel plots of (a) cohort studies reporting adjusted measures of effect, (b) case-control studies reporting unadjusted measures of effect, and (c) case-control studies reporting adjusted measures of effect.



**eTable 1.** Risk Adjustment for Each Included Study

| <i>Cohort studies</i> |                                                                                                                                                                                                                                                                                                                                                                                                                                |
|-----------------------|--------------------------------------------------------------------------------------------------------------------------------------------------------------------------------------------------------------------------------------------------------------------------------------------------------------------------------------------------------------------------------------------------------------------------------|
| <b>Author (year)</b>  | <b>Risk adjustment</b>                                                                                                                                                                                                                                                                                                                                                                                                         |
| Coulson (1993)        | Vasectomy control group was matched on age, race, marital status, and neighbourhood; no regression adjustment                                                                                                                                                                                                                                                                                                                  |
| Davenport (2016)      | Not reported                                                                                                                                                                                                                                                                                                                                                                                                                   |
| Eisenberg (2015)      | Adjusted for age, year of evaluation, comorbidity, follow-up time                                                                                                                                                                                                                                                                                                                                                              |
| Giovannucci (1993)    | Age-adjusted<br>Then further adjusted for smoking, alcohol intake, educational level, body-mass index, geographical residence in separate models (but these estimates were not reported)                                                                                                                                                                                                                                       |
| Goldacre (2005)       | Age-adjusted                                                                                                                                                                                                                                                                                                                                                                                                                   |
| Hiatt (1994)          | Adjusted for age, race, marital status, education                                                                                                                                                                                                                                                                                                                                                                              |
| Jacobs (2016)         | CPS-II (lethal Pca): Adjusted for age, race, education, BMI, smoking.<br>CPS-II-N: Adjusted for age, race, education, BMI, smoking, history of PSA testing                                                                                                                                                                                                                                                                     |
| Lynge (2002)          | Standardized by age and year of diagnosis                                                                                                                                                                                                                                                                                                                                                                                      |
| Nayan (2016)          | Matched on: age, co-morbidity, geographical area, index date<br>Incident Pca: Further adjusted for income level, visit to specialists, visits to urologists, emergency room visits, GP visits<br>HG and Adv Pca: Further adjusted for socioeconomic status, visits to specialists and urologists, visits to GPs, emergency room visits, admissions to hospital<br>Prostate cancer mortality: Further adjusted for income level |
| Rohrmann (2005)       | Adjusted for age.<br><br>Authors additionally considered adjusting for body-mass index, smoking history, history of brother or father with prostate cancer, alcohol consumption, intake of processed meat, intake of tomatoes or tomato juice, use of Vitamin E - but none of these appeared to be confounders and therefore only age-adjusted                                                                                 |

|                                    |                                                                                                                                                                                                                         |
|------------------------------------|-------------------------------------------------------------------------------------------------------------------------------------------------------------------------------------------------------------------------|
|                                    | estimates were provided                                                                                                                                                                                                 |
| Romero (2012)                      | Multivariable analysis performed, however it is not stated what was adjusted for                                                                                                                                        |
| Shoag (2016)                       | Stratified by age at vasectomy and study arm (i.e. screening vs. usual care)<br>Adjusted for baseline demographics, including history of prior PSA screening and DRE                                                    |
| Siddiqui (2014)                    | Adjusted for age, race, height, BMI, vigorous physical activity, smoking, diabetes, family history of Pca, multivitamin use, use of Vitamin E supplements, history of PSA testing                                       |
| Byrne (2017)                       | Stratification by age at recruitment and recruitment center;<br>Adjusted for body-mass index, smoking status, marital status, educational attainment, alcohol consumption, physical activity, protein for dairy sources |
| Tangen (2016)                      | Adjusted for age, ethnicity, family history, baseline PSA level                                                                                                                                                         |
| Van Leeuwen (2011)                 | Adjusted for age, Charlson comorbidity score, family history of Pca, IPSS, DRE, serum PSA, prostate volume, TRUS findings                                                                                               |
| <b><i>Case control studies</i></b> |                                                                                                                                                                                                                         |
| <b>Author (Year)</b>               | <b>Risk adjustment</b>                                                                                                                                                                                                  |
| Andersson (1996)                   | Age                                                                                                                                                                                                                     |
| Lesko (1999)                       | Age-matched<br>Further adjusted for race, religion, level of education, FMHx of Pca, dietary fat intake, BMI, alcohol use, tobacco use, coffee use, urological symptoms, number of MD visits in past 2 years            |
| Cossack (2014)                     | None                                                                                                                                                                                                                    |
| Cox (2002)                         | Age-adjusted.<br><br>Further adjusted for social class, geographical region, religious affiliation, family history of PCa did not alter estimates (but this adjusted estimate were not reported).                       |

|                       |                                                                                                                                                                                                                                                     |
|-----------------------|-----------------------------------------------------------------------------------------------------------------------------------------------------------------------------------------------------------------------------------------------------|
| Emard (2001)          | None                                                                                                                                                                                                                                                |
| Ewings (1996)         | Controls were age-matched.<br><br>Further age-adjustment was performed, but estimates did not change and therefore unadjusted age-matched ORs were reported                                                                                         |
| Ganesh (2011)         | Adjusted for age, education, and religion                                                                                                                                                                                                           |
| Hayes (1993)          | Adjusted for age, race                                                                                                                                                                                                                              |
| Hennis (2013)         | Matched on age (by 5 year age groups)<br>Adjusted for age, marital status, religion, lifetime occupation, family history of PCa, waist-hip ratio                                                                                                    |
| Holt (2008)           | Adjusted for age, race, first-degree family history of prostate cancer, screening history of PSA/DRE in last 5 years                                                                                                                                |
| Honda (1988)          | Age and neighborhood matched<br>Stated that adjustment for cigarette smoking, demographic variables, marital factors, fertility factors, sexual history factors did not substantially alter associations, but adjusted estimates were not reported. |
| Hsing (1994)          | Adjusted for marital status, socioeconomic index, alcohol use, BPH, prostatitis                                                                                                                                                                     |
| John (1995)           | Matched and adjusted for region of residence, age, race/ethnicity                                                                                                                                                                                   |
| Kobayashi (2012)      | *None (study evaluating diff exposure. Vasectomy OR calculated)                                                                                                                                                                                     |
| Liang (2007)          | Matched for age, sex, race, resident location<br>Not further risk-adjusted                                                                                                                                                                          |
| Lightfoot (2004)      | Age-adjusted estimate provided. This was a study of Pca risk factors. They did not include in final multivariable model since not retained upon stepwise selection                                                                                  |
| Mazdak (2012)         | None                                                                                                                                                                                                                                                |
| Mettlin (1990)        | Age-adjusted                                                                                                                                                                                                                                        |
| Nair-Shalliker (2016) | Age-adjusted                                                                                                                                                                                                                                        |

|                  |                                                                                                                                                                                                                                                |
|------------------|------------------------------------------------------------------------------------------------------------------------------------------------------------------------------------------------------------------------------------------------|
| Patel (2005)     | Adjusted for age, race, education, family history of prostate cancer in first degree relative                                                                                                                                                  |
| Platz (1997)     | Age-adjusted<br>MV1: Adjusted for age, smoking<br>MV2: Adjusted for age, smoking, alcohol drinking, employment status, marital status, education, religion, languages spoken, residence, rural area, previous residence, monthly family income |
| Pourmand (2007)  | None                                                                                                                                                                                                                                           |
| Rosenberg (1994) | Adjusted for age, years of education, marital status, number of hospitalizations, cigarette smoking, interview year, geographical area                                                                                                         |
| Ross (1983)      | Matched on birth-date<br>No risk adjustment otherwise                                                                                                                                                                                          |
| Schwingl (2009)  | Matched on age and residence in the primary catchment area of hospital<br>Potential confounding variables were included in models if they changed OR estimate by >5%. However, it is not stated which variables were included in final model.  |
| Spitz (1991)     | Age matched, otherwise no multivariable adjustment                                                                                                                                                                                             |
| Sridhar (2010)   | None                                                                                                                                                                                                                                           |
| Stanford (1999)  | Adjusted for age, race, family history of prostate cancer, number of PSA tests within 5y before reference date                                                                                                                                 |
| Sunny (2005)     | Age-matched<br>Adjusted for age and "other probable confounding characteristics" (exact variable not specified)                                                                                                                                |
| Tyagi (2010)     | Age-matched<br>Not further risk-adjusted                                                                                                                                                                                                       |
| Wei (1994)       | Matched on age, sex, race, day of admission                                                                                                                                                                                                    |
| Weinmann (2010)  | Matched on age, race, health plan, and length of health plan membership                                                                                                                                                                        |

|                                |                                                                                                                                                                                                                                                                                                                                     |
|--------------------------------|-------------------------------------------------------------------------------------------------------------------------------------------------------------------------------------------------------------------------------------------------------------------------------------------------------------------------------------|
| Zhu (1996)                     | Matched on year of birth, Group Health Cooperative Membership, length of Group Health Cooperative enrolment, source of primary medical care<br><br>Adjusted for year of birth, Group Health Cooperative membership, length of Group Health Cooperative enrolment, source of primary medical care, family history of prostate cancer |
| <i>Cross-sectional studies</i> |                                                                                                                                                                                                                                                                                                                                     |
| <b>Author (year)</b>           | <b>Risk adjustment</b>                                                                                                                                                                                                                                                                                                              |
| Alqahtani (2015)               | None                                                                                                                                                                                                                                                                                                                                |
| Chacko (2002)                  | None                                                                                                                                                                                                                                                                                                                                |
| DeAntoni (1997)                | None                                                                                                                                                                                                                                                                                                                                |
| Garzotto (2003)                | None                                                                                                                                                                                                                                                                                                                                |

**eTable 2.** Newcastle-Ottawa Scale for Risk of Bias Assessment of Studies Included in the Meta-Analysis

| Studies                 | Selection                            |                          |                           |                              | Comparability | Outcome               |                           |                       | Overall |
|-------------------------|--------------------------------------|--------------------------|---------------------------|------------------------------|---------------|-----------------------|---------------------------|-----------------------|---------|
|                         | Representativeness of exposed cohort | Selection of non-exposed | Ascertainment of exposure | Outcome not present at start |               | Assessment of outcome | Adequate follow-up length | Adequacy of follow-up |         |
| Cohort studies          |                                      |                          |                           |                              |               |                       |                           |                       |         |
| Coulson (1993)          | 1                                    | 1                        | 1                         | 1                            | 1             | 1                     | 1                         | 1                     | 8       |
| Davenport (2016)        | 1                                    | 1                        | 0                         | 1                            | 0             | 0                     | 0                         | 0                     | 3       |
| Eisenberg (2015)        | 1                                    | 1                        | 1                         | 1                            | 1             | 1                     | 0                         | 0                     | 6       |
| Giovannucci (1993)      | 1                                    | 1                        | 0                         | 1                            | 1             | 0                     | 1                         | 1                     | 6       |
| Goldacre (2005)         | 1                                    | 1                        | 1                         | 1                            | 1             | 1                     | 1                         | 1                     | 8       |
| Hiatt (1994)            | 1                                    | 1                        | 0                         | 1                            | 1             | 1                     | 0                         | 1                     | 6       |
| Jacobs (2016)           | 1                                    | 1                        | 0                         | 1                            | 2             | 1                     | 1                         | 1                     | 8       |
| Lynge (2002)            | 1                                    | 0                        | 1                         | 1                            | 0             | 1                     | 1                         | 1                     | 6       |
| Nayan (2016)            | 1                                    | 1                        | 1                         | 1                            | 2             | 1                     | 1                         | 1                     | 9       |
| Rohrmann (2005)         | 1                                    | 1                        | 0                         | 1                            | 1             | 1                     | 1                         | 0                     | 6       |
| Romero (2012)           | 1                                    | 1                        | 0                         | 1                            | 0             | 1                     | 0                         | 0                     | 4       |
| Shoag (2016)            | 1                                    | 1                        | 0                         | 1                            | 2             | 1                     | 1                         | 1                     | 8       |
| Siddiqui (2014)         | 1                                    | 1                        | 0                         | 1                            | 2             | 1                     | 1                         | 1                     | 8       |
| Smith-Byrne (2017)      | 1                                    | 1                        | 0                         | 1                            | 1             | 1                     | 1                         | 1                     | 7       |
| Tangen (2016)           | 1                                    | 1                        | 0                         | 1                            | 1             | 1                     | 1                         | 1                     | 7       |
| Van Leeuwen (2011)      | 1                                    | 1                        | 0                         | 1                            | 2             | 1                     | 1                         | 1                     | 8       |
| Cross-sectional studies |                                      |                          |                           |                              |               |                       |                           |                       |         |
| Alqahtani (2015)        | 0                                    | 1                        | 0                         | 1                            | 0             | 1                     | 0                         | 0                     | 3       |
| Chacko (2002)           | 0                                    | 1                        | 0                         | 1                            | 0             | 1                     | 0                         | 0                     | 3       |
| DeAntoni (1997)         | 1                                    | 1                        | 0                         | 1                            | 0             | 1                     | 0                         | 0                     | 4       |
| Garzotto (2003)         | 0                                    | 1                        | 0                         | 1                            | 0             | 1                     | 0                         | 0                     | 3       |

|                       | Selection       |                             |                       |                    | Comparability | Exposure                  |                                 |                   | Overall |
|-----------------------|-----------------|-----------------------------|-----------------------|--------------------|---------------|---------------------------|---------------------------------|-------------------|---------|
|                       | Case definition | Representativeness of cases | Selection of controls | Control definition |               | Ascertainment of exposure | Comparable ascertainment method | Non-response rate |         |
| Case-control studies  |                 |                             |                       |                    |               |                           |                                 |                   |         |
| Andersson (1996)      | 1               | 1                           | 1                     | 1                  | 1             | 1                         | 1                               | 1                 | 8       |
| Cossack (2014)        | 0               | 0                           | 1                     | 0                  | 0             | 0                         | 1                               | 0                 | 2       |
| Cox (2002)            | 1               | 1                           | 1                     | 1                  | 1             | 1                         | 1                               | 1                 | 8       |
| Emard (2001)          | 1               | 1                           | 0                     | 0                  | 0             | 1                         | 1                               | 0                 | 4       |
| Ewings (1996)         | 1               | 1                           | 0                     | 0                  | 1             | 0                         | 1                               | 1                 | 5       |
| Ganesh (2011)         | 1               | 0                           | 0                     | 1                  | 1             | 0                         | 1                               | 0                 | 4       |
| Hayes (1993)          | 1               | 1                           | 1                     | 1                  | 1             | 0                         | 1                               | 1                 | 7       |
| Hennis (2013)         | 1               | 1                           | 1                     | 0                  | 1             | 1                         | 1                               | 1                 | 7       |
| Holt (2008)           | 1               | 1                           | 1                     | 0                  | 2             | 0                         | 1                               | 1                 | 7       |
| Honda (1988)          | 1               | 0                           | 1                     | 0                  | 1             | 0                         | 1                               | 0                 | 4       |
| Hsing (1994)          | 1               | 0                           | 1                     | 0                  | 1             | 0                         | 0                               | 0                 | 3       |
| John (1995)           | 1               | 1                           | 1                     | 0                  | 1             | 0                         | 1                               | 1                 | 6       |
| Kobayashi (2012)      | 1               | 0                           | 0                     | 1                  | 0             | 1                         | 1                               | 0                 | 4       |
| Lesko (1999)          | 1               | 0                           | 1                     | 1                  | 1             | 1                         | 1                               | 0                 | 6       |
| Liang (2007)          | 1               | 0                           | 0                     | 0                  | 1             | 0                         | 1                               | 0                 | 3       |
| Lightfoot (2004)      | 1               | 1                           | 1                     | 0                  | 1             | 0                         | 1                               | 0                 | 5       |
| Mazdak (2012)         | 1               | 0                           | 0                     | 1                  | 0             | 0                         | 0                               | 0                 | 2       |
| Mettlin (1990)        | 0               | 1                           | 0                     | 0                  | 1             | 0                         | 1                               | 0                 | 3       |
| Nair-Shalliker (2016) | 0               | 1                           | 1                     | 0                  | 1             | 0                         | 1                               | 0                 | 4       |
| Patel (2005)          | 1               | 1                           | 1                     | 0                  | 1             | 0                         | 1                               | 1                 | 6       |
| Platz (1997)          | 1               | 1                           | 0                     | 0                  | 1             | 0                         | 1                               | 1                 | 5       |
| Pourmand (2007)       | 1               | 0                           | 0                     | 1                  | 0             | 0                         | 1                               | 1                 | 4       |
| Rosenberg (1994)      | 1               | 1                           | 0                     | 1                  | 1             | 0                         | 1                               | 1                 | 6       |
| Ross (1983)           | 0               | 0                           | 1                     | 1                  | 1             | 0                         | 1                               | 0                 | 4       |
| Schwingl (2009)       | 1               | 0                           | 0                     | 0                  | 1             | 0                         | 1                               | 0                 | 3       |
| Spitz (1991)          | 1               | 0                           | 0                     | 0                  | 1             | 0                         | 1                               | 0                 | 3       |
| Sridhar (2010)        | 1               | 1                           | 0                     | 1                  | 0             | 0                         | 1                               | 0                 | 4       |
| Stanford (1999)       | 1               | 1                           | 1                     | 1                  | 2             | 1                         | 1                               | 1                 | 9       |
| Sunny (2005)          | 1               | 0                           | 1                     | 1                  | 1             | 0                         | 1                               | 0                 | 5       |
| Tyagi (2010)          | 1               | 0                           | 1                     | 0                  | 1             | 0                         | 1                               | 0                 | 4       |

|                 |   |   |   |   |   |   |   |   |   |
|-----------------|---|---|---|---|---|---|---|---|---|
| Wei (1994)      | 1 | 0 | 0 | 0 | 1 | 0 | 1 | 0 | 3 |
| Weinmann (2010) | 0 | 1 | 0 | 1 | 1 | 0 | 0 | 0 | 3 |
| Zhu (1996)      | 1 | 1 | 0 | 1 | 1 | 1 | 1 | 1 | 7 |



**eTable 3.** Pooled Adjusted Estimates for Association Between Vasectomy and Prostate Cancer, Excluding Abstracts

| <b>Analysis</b>          | <b>Pooled effect estimate</b>                            |
|--------------------------|----------------------------------------------------------|
| All cohort studies       | aRR=1.10; 95% CI 1.01-1.19; p=0.02; I <sup>2</sup> =69%  |
| Time-to-event analyses   | aHR=1.12; 95% CI 1.03-1.22; p=0.009; I <sup>2</sup> =77% |
| Low risk-of-bias studies | aHR=1.05; 95% CI 1.01-1.09; p=0.02; I <sup>2</sup> =20%  |

**eTable 4.** Studies Reporting on the Impact Time Since Vasectomy on the Association Between Vasectomy and Prostate Cancer

| Study (year)               | Time since vasectomy                                                    |                            |                            |                            |                                                                          |           |
|----------------------------|-------------------------------------------------------------------------|----------------------------|----------------------------|----------------------------|--------------------------------------------------------------------------|-----------|
|                            | <5 years                                                                | 5–9 years                  | 10–14 years                | 15–19 years                | 20–29 years                                                              | ≥30 years |
| <b>Cohort design</b>       |                                                                         |                            |                            |                            |                                                                          |           |
| Giovanucci (1993)          | HR=1.11 (95%CI 0.46-2.70)                                               |                            | HR=1.26 (95%CI 0.75-2.10)  |                            | HR=1.89 (95%CI 1.14-3.14)                                                |           |
| Goldacre (2005)            | RR=0.77 (95%CI 0.02-4.29)                                               | RR=0.37 (95%CI 0.01-2.06)  | RR=0.69 (95%CI 0.34-1.24)  |                            | RR=0.93 (95%CI 0.40-1.85)                                                |           |
| Lynge (2002)               | SIR=0.95 (95%CI 0.31-2.21)                                              | SIR=1.24 (95%CI 0.71-2.01) | SIR=1.12 (95%CI 0.69-1.72) | SIR=0.40 (95%CI 0.11-1.02) |                                                                          |           |
| Rohrmann (2005)            | HR=2.21 (95%CI 0.92-5.34)                                               |                            |                            |                            | HR=2.03 (95%CI 1.19-3.47)                                                |           |
| Siddiqui (2014)            | <23yrs: HR=1.12 (1.01-1.25)                                             |                            |                            |                            | ≥23yrs: HR=1.10 (1.02-1.17)                                              |           |
| Smith-Byrne (2017)         | NR (test for heterogeneity by time since vasectomy: p=0.9) <sup>a</sup> |                            |                            |                            |                                                                          |           |
| <b>Case-control design</b> |                                                                         |                            |                            |                            |                                                                          |           |
| Lesko (1999)               | OR=1.1 (95%CI 0.5-2.4)                                                  |                            |                            | OR=1.7 (95%CI 0.7-3.8)     | OR=4.3 (95%CI 1.7-11.0)                                                  |           |
| Cox (2002)                 | OR=0.76 (95%CI 0.46-1.26)                                               |                            |                            | OR=1.16 (95%CI 0.76-1.78)  | 20-24yrs: OR=0.92 (95%CI 0.66-1.30)<br>≥25yrs: OR=0.92 (95%CI 0.68-1.23) |           |

|                |                                                                                     |                                                                                                                                                                                                  |                                |                                           |                                           |
|----------------|-------------------------------------------------------------------------------------|--------------------------------------------------------------------------------------------------------------------------------------------------------------------------------------------------|--------------------------------|-------------------------------------------|-------------------------------------------|
|                |                                                                                     |                                                                                                                                                                                                  |                                |                                           |                                           |
| Emard (2001)   | 1-2y:<br>OR=2.1<br>(95%CI<br>0.5-9.5)<br><br>3-4y:<br>OR=4.8<br>(95%CI<br>0.5-10.6) | 5-6y: OR=0.5 (95%CI<br>0.1-5.0)<br><br>7-8y: OR=0.9 (95%CI<br>0.3-3.0)<br><br>9-10y: OR=2.3<br>(95%CI 1.0-6.1)<br><br>11-12y: OR=1.5<br>(95%CI 0.8-3.5)<br><br>13-14y: OR=2.9<br>(95%CI 1.5-5.5) | OR=3.2 (95%CI 1.4-7.5)         |                                           |                                           |
| Hayes (1993)   | NR                                                                                  | OR=1.2<br>(95%CI<br>0.5-2.9)                                                                                                                                                                     | OR=1.0 (95%CI 0.6-<br>1.6)     | OR=1.5 (95%CI 0.8-<br>2.7)                |                                           |
| Holt (2008)    | OR=1.1 (95%CI 0.7-1.6)                                                              |                                                                                                                                                                                                  | OR=1.6<br>(95%CI<br>1.0-2.7)   | 20-24yrs:<br>OR=1.1<br>(95%CI<br>0.7-1.7) | 30-34yrs:<br>OR=0.9<br>(95%CI<br>0.6-1.2) |
|                |                                                                                     |                                                                                                                                                                                                  |                                | 25-29yrs:<br>OR=1.1<br>(95%CI<br>0.8-1.6) | □35yrs:<br>OR=0.7<br>(95%CI<br>0.5-1.1)   |
| Honda (1988)   | RR=0.7 (95%CI 0.3-<br>1.9)                                                          | RR=1.0 (95%CI 0.5-<br>2.0)                                                                                                                                                                       | RR=2.2<br>(95%CI<br>1.0-4.8)   | RR=4.4<br>(95%CI<br>0.9-21.0)             |                                           |
| John (1995)    | OR=1.3 (95%CI 0.82-2.0)                                                             |                                                                                                                                                                                                  | OR=0.97<br>(95%CI<br>0.66-1.4) | OR=1.0<br>(95%CI<br>0.71-1.4)             |                                           |
| Mettlin (1990) | Tertile I (5-12yrs) <sup>b</sup> :                                                  |                                                                                                                                                                                                  | Tertile II (13-                | Tertile III (□19yrs) <sup>b</sup> :       |                                           |

|                                      |                           |                                              |                                                                                                                                                     |
|--------------------------------------|---------------------------|----------------------------------------------|-----------------------------------------------------------------------------------------------------------------------------------------------------|
|                                      | RR=1.2 (95%CI 0.5-2.8)    | 18yrs) <sup>b</sup> : RR=2.2 (95%CI 1.0-4.6) | RR=1.5 (95%CI 0.7-3.4)                                                                                                                              |
| Platz (1997)                         | OR=1.25 (95%CI 0.35-4.40) |                                              | OR=1.56 (95%CI 0.79-3.08)                                                                                                                           |
| Rosenberg (1994)                     | no PCa cases              | RR=2.1 (95%CI 0.5-8.6)                       | RR=1.4 (95%CI 0.5-4.2)                                                                                                                              |
| Schwingl (2009)                      | NR                        | OR=0.75 (95%CI 0.21-2.74)                    | OR=1.21 (95%CI 0.65-2.25)    OR=1.39 (95%CI 0.74-2.62)                                                                                              |
| Spitz (1991)                         | Not reported for <27yrs   |                                              | □27yrs: RR=2.2 (95%CI 1.1-4.3) <sup>c</sup>                                                                                                         |
| Stanford (1999)                      | OR=0.68 (95%CI 0.2-1.9)   | OR=0.68 (95%CI 0.3-1.5)                      | OR=0.94 (95%CI 0.5-1.6)    OR=1.11 (95%CI 0.7-1.7)    20-24y: OR=1.11 (95%CI 0.8-1.6)    25-29y: OR=1.42 (95%CI 0.9-2.2)    OR=1.23 (95%CI 0.7-2.1) |
| Sunny (2005)                         | OR=1.2 (95%CI 0.7-2.1)    |                                              | OR=3.8 (95%CI 1.9-7.6)                                                                                                                              |
| Zhu (1996)                           | OR=0.99 (95%CI 0.51-1.95) |                                              | OR=0.84 (95%CI 0.51-1.38)                                                                                                                           |
| <b><i>Cross-sectional design</i></b> |                           |                                              |                                                                                                                                                     |
| DeAntoni (1997)                      | OR=0.76 (95%CI 0.31-1.84) | OR=1.613 (95%CI 0.832-3.127)                 | OR=1.025 (0.580-1.809)                                                                                                                              |

Effect estimates stratified by time since vasectomy are shown. The width of each cell represents the range of time since vasectomy for each given estimate, based on how it lines up with column headings. Exceptions are indicated in the table.

<sup>a</sup> Effect estimates were not reported by subcategories of time since vasectomy, and only interaction testing was reported.

<sup>b</sup> Time since vasectomy was categorized into tertiles.

<sup>c</sup> Only highest tertile reported. It was stated that there was no evidence of a trend.

Abbreviations: NR = not reported; OR = odds ratio; RR = rate ratio; SIR = standardized incidence ratio; CI = confidence interval

**eTable 5.** Studies Reporting on the Impact of Age at Vasectomy on the Association Between Vasectomy and Prostate Cancer

| Study (year)                  | Age at vasectomy                       |                                     |                                     |                                        |                                     |                                                                                                            |
|-------------------------------|----------------------------------------|-------------------------------------|-------------------------------------|----------------------------------------|-------------------------------------|------------------------------------------------------------------------------------------------------------|
|                               | <30                                    | 30-34                               | 35-39                               | 40-44                                  | 45-49                               | ≥50                                                                                                        |
| <b>Cohort design</b>          |                                        |                                     |                                     |                                        |                                     |                                                                                                            |
| Lynge (2002)                  | SIR=14.26<br>(95%CI<br>1.73-<br>51.57) | SIR=0.84 (95%CI<br>0.31-1.82)       |                                     | SIR=0.80 (95%CI<br>0.48-1.25)          |                                     | 50-59y.o.:<br>SIR=1.06<br>(95%CI<br>0.56-<br>1.81)<br><br>≥60y.o.:<br>SIR=1.65<br>(95%CI<br>0.61-<br>3.60) |
| Rohrmann<br>(2005)            | HR=1.77 (95%CI 0.93-3.37)              |                                     |                                     | HR=2.63 (95%CI 1.40-4.94)              |                                     |                                                                                                            |
| Siddiqui<br>(2014)            | <38y.o.: HR=1.14 (95%CI 1.04-<br>1.24) |                                     |                                     | ≥38y.o.: 1.08 (95%CI 1.00-1.16)        |                                     |                                                                                                            |
| Smith-Byrne<br>(2017)         | <38y.o.: HR=1.18 (95%CI 1.03-<br>1.35) |                                     |                                     | ≥38y.o.: HR=0.99 (95%CI 0.89-<br>1.09) |                                     |                                                                                                            |
|                               | p-interaction=0.04                     |                                     |                                     |                                        |                                     |                                                                                                            |
| <b>Cross-sectional design</b> |                                        |                                     |                                     |                                        |                                     |                                                                                                            |
| Lesko (1999)                  | OR=2.7 (95%CI 1.3-<br>5.4)             | OR=1.6<br>(95%CI<br>0.7-3.5)        | OR=0.9 (95%CI 0.3-2.9)              |                                        |                                     |                                                                                                            |
| Cox (2002)                    | OR=1.23 (95%CI<br>0.76-2.01)           | OR=0.81<br>(95%CI<br>0.56-<br>1.17) | OR=0.78<br>(95%CI<br>0.50-<br>1.20) | OR=0.78<br>(95%CI<br>0.50-<br>1.20)    | OR=0.76<br>(95%CI<br>0.45-<br>1.30) |                                                                                                            |

|                  |                                      |                            |                            |                                                 |
|------------------|--------------------------------------|----------------------------|----------------------------|-------------------------------------------------|
| Hayes (1993)     | 25-34y.o.: OR=2.0<br>(95%CI 1.0-4.0) |                            | OR=1.0 (95%CI 0.6-1.3)     | OR=1.0 (95%CI 0.5-1.8)                          |
| Holt (2008)      | OR=1.0<br>(95%CI 0.8-1.2)            | OR=0.8<br>(95%CI 0.6-1.2)  | OR=0.9<br>(95%CI 0.7-1.3)  | OR=1.3 (95%CI 0.9-1.7)                          |
| John (1995)      | OR=0.95 (95%CI 0.68-1.3)             |                            |                            | OR=1.2 (95%CI 0.85-1.6)                         |
| Platz (1997)     | OR=0.77 (95%CI 0.26-2.33)            |                            |                            | OR=2.10 (95%CI 1.02-4.31)                       |
| Rosenberg (1994) | RR=3.4 (95%CI 0.8-14)                |                            |                            | RR=1.2 (95%CI 0.4-3.3)<br>RR=1.8 (95%CI 0.3-11) |
| Schwingl (2009)  | OR=1.25 (95%CI 0.57-2.73)            |                            | OR=1.48 (95%CI 0.80-2.73)  | OR=0.89 (95%CI 0.42-1.92)                       |
| Stanford (1999)  | OR=1.15<br>(95%CI 0.7-1.8)           | OR=1.30<br>(95%CI 0.9-1.9) | OR=1.07<br>(95%CI 0.7-1.6) | OR=0.96 (95%CI 0.7-1.4)                         |
| Sunny (2005)     | OR=2.1 (95%CI 1.2-3.9)               |                            |                            | OR=1.8 (95%CI 1.1-2.9)                          |
| Zhu (1996)       | OR=0.95 (95%CI 0.52-1.72)            |                            | OR=0.83 (95%CI 0.49-1.39)  |                                                 |

Effect estimates stratified by age at vasectomy are shown. The width of each cell represents the range of age at vasectomy for each given estimate, based on how it lines up with column headings. Exceptions are indicated in the table.

Abbreviations: NR = not reported; OR = odds ratio; RR = rate ratio; SIR = standardized incidence ratio; CI = confidence interval; y.o.=years old.

## eReferences

1. Howlader N, Noone AM, Krapcho M, et al. SEER Cancer Statistics Review, 1975-2013, National Cancer Institute. 9/12/2016; [http://seer.cancer.gov/csr/1975\\_2013/](http://seer.cancer.gov/csr/1975_2013/). Accessed 2/3/2017.
2. Daniels K, Daugherty J, Jones J. Current contraceptive Status Among Women Aged 15-44: United States, 2011-2013. *CDC NCHS Data Brief* 2014; <https://www.cdc.gov/nchs/data/databriefs/db173.pdf>. Accessed 2/3/2017.
3. Pile JM, Barone MA. Demographics of vasectomy--USA and international. *Urol Clin North Am*. 2009;36(3):295-305.
4. Nutt M, Reed Z, Kohler TS. Vasectomy and prostate cancer risk: a historical synopsis of undulating false causality. *Res*. 2016;8:85-93.
5. Mo ZN, Huang X, Zhang SC, Yang JR. Early and late long-term effects of vasectomy on serum testosterone, dihydrotestosterone, luteinizing hormone and follicle-stimulating hormone levels. *J Urol*. 1995;154(6):2065-2069.
6. Flickinger CJ, Bush LA, Williams MV, Naaby-Hansen S, Howards SS, Herr JC. Post-obstruction rat sperm autoantigens identified by two-dimensional gel electrophoresis and western blotting. *J Reprod Immunol*. 1999;43(1):35-53.
7. Pereira S, Martinez M, Martinez FE, Junior WM. Repercussions of castration and vasectomy on the ductal system of the rat ventral prostate. *Cell Biol Int*. 2006;30(2):169-174.
8. Howards SS. Possible biological mechanisms for a relationship between vasectomy and prostatic cancer. *Eur J Cancer*. 1993;29A(7):1060-1062.
